1 A Tail Fiber Protein and a Receptor-Binding Protein Mediate ICP2 Bacteriophage Interactions  
2 with *Vibrio cholerae* OmpU

3

4 Andrea N.W. Lim<sup>a</sup>, Minmin Yen\*, Kimberley D. Seed\*, David W. Lazinski, Andrew Camilli<sup>#</sup>

5

6 Department of Molecular Biology and Microbiology, Tufts University, School of Medicine,  
7 Boston, Massachusetts, USA

8 <sup>a</sup>Department of Molecular Biology and Microbiology, Graduate School of Biomedical Sciences,  
9 Tufts University, School of Medicine, Boston, Massachusetts, USA

10

11 Running title: Identification of two ICP2 tail fiber proteins

12

13 <sup>#</sup>Address correspondence to Andrew Camilli, [andrew.camilli@tufts.edu](mailto:andrew.camilli@tufts.edu).

14 \*Present address: Minmin Yen, PhagePro, Inc., Boston, Massachusetts, USA.

15 \*Present address: Kimberley D. Seed, Department of Plant and Microbial Biology, University of  
16 California, Berkeley, Berkeley, California, USA.

17

18

19

20

21

22

## 23 **Abstract**

24 ICP2 is a virulent bacteriophage (phage) that preys on *Vibrio cholerae*. ICP2 was first  
25 isolated from cholera patient stool samples. Some of these stools also contained ICP2-resistant  
26 isogenic *V. cholerae* strains harboring missense mutations in the trimeric outer membrane porin  
27 protein OmpU, identifying it as the ICP2 receptor. In this study, we identify the ICP2 proteins  
28 that mediate interactions with OmpU by selecting for ICP2 host-range mutants within infant  
29 rabbits infected with a mixture of wild type and OmpU mutant strains. ICP2 host-range mutants  
30 had missense mutations in putative tail fiber gene *gp25* and putative adhesin *gp23*. Using site-  
31 specific mutagenesis we show that single or double mutations in *gp25* are sufficient to generate  
32 the host-range mutant phenotype. However, at least one additional mutation in *gp23* is required  
33 for robust plaque formation on specific OmpU mutants. Mutations in *gp23* alone were  
34 insufficient to give a host-range mutant phenotype. All ICP2 host-range mutants retained the  
35 ability to plaque on wild type *V. cholerae* cells. The strength of binding of host-range mutants to  
36 *V. cholerae* correlated with plaque morphology, indicating that the selected mutations in *gp25*  
37 and *gp23* restore molecular interactions with the receptor. We propose that ICP2 host-range  
38 mutants evolve by a two-step process where, first, *gp25* mutations are selected for their broad  
39 host-range, albeit accompanied by low level phage adsorption. Subsequent selection occurs for  
40 *gp23* mutations that further increase productive binding to specific OmpU alleles, allowing for  
41 near wild type efficiencies of adsorption and subsequent phage multiplication.

## 42 **Importance**

43 Concern over multidrug-resistant bacterial pathogens, including *Vibrio cholerae*, has led  
44 to a renewed interest in phage biology and their potential for phage therapy. ICP2 is a genetically  
45 unique virulent phage isolated from cholera patient stool samples. It is also one of three phages

46 in a prophylactic cocktail shown to be effective in animal models of infection and the only one of  
47 the three that requires a protein receptor (OmpU). This study identifies a ICP2 tail fiber and a  
48 receptor binding protein and examines how ICP2 responds to the selective pressures of phage-  
49 resistant OmpU mutants. We found that this particular co-evolutionary arms race presents fitness  
50 costs to both ICP2 and *V. cholerae*.

51

## 52 **Introduction**

53       Vibriophages, phages that prey on bacteria from the gram-negative *Vibrio* genus, were  
54 first described by E.H. Hankin in 1896 as antimicrobial agents from the Ganges River, two  
55 decades before phages were formally identified by Twort and d'Herelle (1, 2). Growing concern  
56 over the emergence of multidrug-resistant strains of *Vibrio cholerae* (3), the causative agent of  
57 cholera, has renewed scientific interest in vibriophages as therapeutics (2, 4) and environmental  
58 markers of cholera outbreaks (5-7). In 2011, our lab isolated three unique virulent vibriophages  
59 from the rice-water stools of Bangladeshi cholera patients, designated phages ICP1, ICP2, and  
60 ICP3 (7). ICP2 is morphologically categorized as a short-tailed podovirus but bears little genetic  
61 homology to the canonical podovirus T7 or other members of the family. Its 50 kb genome  
62 encodes 73 putative protein coding sequences divided into two transcriptional units in opposite  
63 orientations.

64       An isolate of ICP2 was also recovered in 2014 from the rice-water stool of a Haitian  
65 cholera patient (8). This sample also contained several ICP2-resistant isogenic *V. cholerae*  
66 strains that had missense mutations in *ompU*. OmpU is an outer membrane general porin that is  
67 associated with virulence (9-11), adherence (12), and osmoregulation (13-15). ICP2-resistant  
68 strains with null mutations in *toxR* were also found among several stool samples containing

69 ICP2. ToxR is a transcriptional activator of virulence genes including *ompU*. Accordingly, the  
70 *toxR* null mutations resulted in attenuated *V. cholerae* colonization in an infant mouse model as  
71 well as the complete loss of *ompU* expression (9). Further experiments showed that two OmpU  
72 missense mutations, V324F and G325D, only minimally affect *V. cholerae* fitness. These  
73 mutations identified OmpU as the ICP2 receptor and demonstrated how vibriophages impose  
74 selective pressures during cholera infections.

75 In 2018, two groups solved the crystal structure of *V. cholerae* OmpU (16, 17). OmpU is  
76 an outer membrane localized homotrimer, with each monomer comprised of a 16- $\beta$ -stranded  
77 barrel. Each monomer has a central pore of ~0.55-0.6 nm wide (17) and has 8 protruding  
78 extracellular loops (Figure 1). L2 projects into the neighboring monomer, while L3 is a  
79 constriction loop that bends into the center of each barrel. The OmpU residues that mutated to  
80 confer ICP2 resistance in the stool samples (8) are highlighted on one monomer-monomer  
81 interface in Figure 1 (8, 16). All mutations, except N158Y, are in L4 and L8. These extracellular  
82 loops are adjacent between neighboring monomers. N158Y is found near the transmembrane  
83 region of L3, and its affect on OmpU localization or structure are unknown. These observations  
84 suggest that ICP2 binds *V. cholerae* at the L4 and L8 interfaces of OmpU trimers. We sought to  
85 identify the ICP2 proteins that interact with OmpU and examine how ICP2 may counter-evolve  
86 in response to phage-resistant *V. cholerae* OmpU mutants.

87 **Results**

88 **ICP2 host-range mutants have missense mutations in *gp23* and *gp25***

89 ICP2 host-range mutants were selected during intestinal infection of infant rabbits co-  
90 inoculated with ICP2 and a mixture of *V. cholerae* wild type (WT) and OmpU point mutant  
91 strains at a 10:1 ratio. The addition of WT *V. cholerae* was designed to allow for enough  
92 replication of ICP2 to yield spontaneous host-range mutants that could then be enriched by  
93 replicating on the OmpU mutants. Until the appearance of such host-range mutants, the OmpU  
94 mutants have a competitive advantage over WT *V. cholerae* due to lack of predation by ICP2.  
95 Indeed, this was shown previously when ICP2 predation resulted in a 10,000-fold competitive  
96 advantage for OmpU G325D over the WT after 12 hours of infection of infant rabbits (8). One  
97 group of four animals was inoculated with WT *V. cholerae* and a mixture of OmpU  
98 A196\_Y198dup, OmpU A195T, OmpU L319R, and OmpU S329L. A second group of four  
99 animals was inoculated with WT and a mixture of OmpU A182\_T193dup, OmpU V324F, and  
100 OmpU N158Y. A third group of four animals was infected with WT and OmpU G325D. ICP2 in  
101 cecal fluid obtained from euthanized symptomatic animals was plaqued on soft agarose overlays  
102 containing specific OmpU mutants to isolate host-range mutants. These included OmpU mutants  
103 A195T, V324F, and G325D. Up to seven plaques per host strain per animal were chosen for  
104 plaque purification on each respective OmpU mutant. All plaques were clear and of equivalent  
105 size as those formed by WT ICP2 on WT *V. cholerae*.

106 The ICP2 host-range mutants were whole-genome sequenced to identify possible  
107 mutations. Of the 28 isolates sequenced, thirteen were unique (Figure 2A). Those isolated on  
108 OmpU V324F or OmpU G325D contained multiple single nucleotide variants (SNVs) in *gp23*  
109 and *gp25* (Figure 2), each a missense mutation. This strongly implicates Gp23 and/or Gp25 as

110 ICP2 proteins that interact with the OmpU receptor. According to homology analysis via  
111 Iterative Threading Assembly Refinement (I-TASSER) (18-20) and the Rapid Annotation using  
112 Subsystem Technology version 2 (RAST) (21, 22), *gp23* encodes a putative receptor binding  
113 adhesin protein and *gp25* encodes a putative phage tail fiber. Although *gp24* is also annotated as  
114 a putative tail fiber, no mutations were found in this gene. It is unlikely that Gp23 and Gp25 are  
115 tail tube proteins because those have previously been identified bioinformatically as Gp9, Gp10,  
116 and Gp11 (23).

117 ICP2 mutants isolated on OmpU V324F have a Gp23 S188A mutation, while those  
118 isolated on OmpU G325D have a Gp23 S209R mutation (Figure 2). Gp25 mutations were more  
119 prevalent and varied among the ICP2 host-range mutants. Gp25 mutations clustered near the N-  
120 and C-termini, which are outside or near the ends of two predicted collagen fiber-like domains  
121 (Figure 2). Gp25 mutations exhibit loose specificity for individual OmpU alleles. Residues Q510  
122 and N690 both mutated to different amino acids in different ICP2 phages isolated on the OmpU  
123 G325D mutant. In contrast, a single S742P mutation was shared among phages isolated on both  
124 OmpU V324F and G325D mutants. Because these ICP2 host-range mutants were selected during  
125 intestinal infection, we could not determine how many rounds of phage replication occurred  
126 before developing the ability to infect an OmpU mutant nor the order in which Gp23 and Gp25  
127 mutations were selected. Therefore, we next sought to parse the relationship between the ICP2  
128 Gp23 and Gp25 mutations and *V. cholerae* OmpU alleles.

### 129 **ICP2 host-range mutants require at least one Gp25 mutation**

130 Plasmid-based recombination in *V. cholerae* was used to generate ICP2 mutants with the  
131 *gp25* mutations identified in VF(2), GD(6), and GD(1). Host-range mutants are herein named for  
132 the OmpU mutant host on which they were isolated followed by a unique identifying number.

133 VF(2) and GD(6) both contain a Gp25 S742P mutation despite being isolated on different OmpU  
134 mutants. Gp25 in GD(6) also contains a unique second K159E mutation. GD(1) contains Gp25  
135 D96N and S676A mutations. Recombinant plaques with single Gp25 S742P mutations, derived  
136 from VF(2) or GD(6), were isolated and plaque-purified once on OmpU V324F and then  
137 amplified on WT. GD(1) recombinants were isolated and plaque-purified once on OmpU G325D  
138 and then amplified on WT. We chose to amplify on WT instead of an OmpU mutant in order to  
139 limit further selection for spontaneous mutations that might increase infectivity on the latter host.  
140 All host-range mutants isolated in this study formed clear, normal sized plaques on WT,  
141 suggesting there would not be selective pressure for additional mutations on this host. Control  
142 recombination infections using a plasmid containing WT *gp23* and *gp25* did not result in any  
143 host-range mutants. The recombinant mutants were whole-genome sequenced to verify  
144 mutations. Recombinant mutants are designated with an "R" and a unique identifying number  
145 following their parent name (Figure 2C).

146 Efficiency-of-plaquing (EOP) assays were used to quantify how efficiently these mutants  
147 can infect OmpU V324F and G325D relative to WT cells. Low EOPs often correlated with a  
148 turbid plaque morphology (Figure 3A). Recombinant ICP2 mutants with only one or two Gp25  
149 mutations maintain the ability to form clear plaques on WT host cells but can only weakly form  
150 plaques, i.e., low EOPs and turbid plaques, on either OmpU V324F or OmpU G325D. No host-  
151 range mutants formed plaques on a  $\Delta ompU$  control, indicating that they are interacting with  
152 either OmpU V324F or G325D and not another receptor. Isolates VF(2)R1 and GD(6)R1 are  
153 biological duplicates with a Gp25 S742P mutation. While they form turbid plaques on both  
154 OmpU V324F and G325D, their EOP on OmpU V324F is only 10-fold lower than on WT  
155 (Figure 3A). In contrast, their EOPs on OmpU G325D are 4- to 5-logs lower than on WT.

156 GD(1)R1 and GD(1)R2, with Gp25 mutations D96N and S676A, also form turbid plaques on  
157 both OmpU V324F and G325D. These phage mutants have a clear preference for OmpU G325D,  
158 with GD(1)R2 barely reaching a statistically significant EOP on OmpU V324F. While Gp25  
159 mutations alone do not provide robust phenotypes, at least one is required to weakly infect an  
160 OmpU mutant.

161 Further support for the important role of Gp25 in conferring a host-range phenotype came  
162 from host-range mutants evolved in animals and then isolated on OmpU A195T, a host strain  
163 only partially resistant to WT ICP2 (8). These phage mutants have one or two mutations in Gp25  
164 and no mutations in Gp23 (Figure 2A). This provides further evidence that Gp25 mutations are  
165 sufficient to expand host-range.

166 In host-range assays that included five additional ICP2-resistant OmpU mutants, ICP2  
167 mutants with only one or two Gp25 mutations and no Gp23 mutations exhibit a similar host-  
168 range pattern despite the diversity of their Gp25 mutations (Figure 4, top eight ICP2 mutants). In  
169 addition to forming clear plaques on WT *V. cholerae*, most of these host-range mutants have  
170 higher EOPs on OmpU L319R, S329L, and A182\_T193dup. This suggests that initial Gp25  
171 mutations are necessary and sufficient to expand host-range.

## 172 **Selection of ICP2 host-range mutants *in vitro***

173 The observation that all ICP2 host-range mutants isolated in animals retain the ability to  
174 plaque on WT *V. cholerae* could be due to fact that both WT and OmpU mutants were present  
175 during the selection. To investigate this hypothesis, we sought to isolate host-range mutants *in*  
176 *vitro* on pure cultures of the OmpU A182\_T193dup strain and then test plaque formation on WT  
177 *V. cholerae*. Initial attempts to select ICP2 host-range mutants *in vitro* failed, likely due to lack  
178 of a sufficiently large enough pool of input phage to harbor preexisting mutants. To overcome



179 this limitation, we generated two independent high-titer stocks of ICP2 on a mutator strain of *V.*  
180 *cholerae* in which the mismatch repair gene *mutS* was deleted. Deletion of *mutS* was previously  
181 shown to increase the mutation rate of *V. cholerae* by 100-fold (24). Although it is not known if  
182 the host methyl-directed mismatch repair system functions with ICP1 DNA replication, it is  
183 notable that ICP1 encodes its own DNA adenine methyltransferase (Dam) (8). After two rounds  
184 of selection on the OmpU A182\_T193dup strain, host-range mutants that form clear plaques  
185 were obtained. Whole-genome sequencing of four ICP2 host-range mutants from each  
186 independent selection yielded a total of four lineages; one from the first and three from the  
187 second selection. Previously observed and novel mutations in *gp25* were found, but no mutations  
188 in *gp23* were present (Figure 2B). Two mutants contained the previously observed single Gp25  
189 S742P mutation. Only the three host-range mutants with novel Gp25 mutations are shown in  
190 Figure 2B and were further analyzed. These results are consistent with those obtained from the *in*  
191 *vivo* selected host-range mutants, in that mutations in Gp25 are sufficient to give a host-range  
192 phenotype on an OmpU A182\_T193dup strain.

193         Next, we compared EOP and plaque phenotype on OmpU A182\_T193dup and WT *V.*  
194 *cholerae*. The three host-range mutants formed clear plaques on OmpU A182\_T193dup and, as  
195 observed for the *in vivo* selected host-range mutants, all retained clear plaque formation on WT  
196 *V. cholerae* (Figure 4, rows 9-11). Consistent with this, their EOPs on OmpU A182\_T193dup  
197 and WT were at or near 1. These mutants formed turbid plaques on OmpU L319R and S329L,  
198 similar to the other Gp25-only mutants. Therefore, retention of infection of WT *V. cholerae* in  
199 ICP2 host-range mutants appears to be a general phenomenon, and not the result of selection in  
200 the presence of WT and an OmpU mutant.

201 **Secondary Gp23 mutations increase EOP on specific OmpU mutants**

202 To attempt to isolate ICP2 host-range mutants with only Gp23 mutations, WT *V.*  
203 *cholerae* with plasmids containing *gp23* S188A or S209R alleles were infected with WT ICP2.  
204 However, no recombinant plaques could be isolated on OmpU V324F or G325D. When the  
205 population of progeny phages from these infections were sequenced ~1% of the phage were  
206 found to have the intended mutations. Therefore, it appears that Gp23 mutations alone are  
207 insufficient to give a host-range phenotype.

208 A secondary Gp23 S188A in Gp25-only mutants imparts clear plaque formation on  
209 OmpU V324F. Host-range mutants with secondary Gp23 mutations were generated by using the  
210 ICP2 recombinants with one or two Gp25 mutations to infect WT cells containing plasmids  
211 containing either *gp23* S188A or S209R alleles. The addition of a Gp23 S188A leads to more  
212 efficient plaquing on OmpU V324F for all seven recombinants regardless of initial Gp25  
213 mutations (Figure 3B). VF(2), VF(2)R2, and GD(6)R2 are biological triplicates containing Gp25  
214 S742P and S188A, but were generated in an animal and *in vitro*, respectively. GD(1)R3,  
215 GD(1)R4, GD(1)R5, GD(1)R6, and GD(1)R7 contain Gp25 D96N and S676A from GD(1), as  
216 well as one to two novel Gp25 mutations (Figure 2C). Gp23 S188A was not seen with these  
217 combinations of Gp25 mutations among the host-range mutants evolved *in vivo*.

218 Similarly, a secondary Gp23 S209R mutation results in increased EOPs and/or clear  
219 plaque formation for all five recombinants on OmpU G325D regardless of initial Gp25  
220 mutations (Figure 3C). VF(2)R3, containing Gp25 S742P and Gp23 S209R, was the only  
221 recombinant that still forms turbid plaques on OmpU G325D, but its EOP of 0.19 is markedly  
222 higher than that of Gp25 S742P mutant VF(2)R1, which has a mean EOP of  $2.3 \times 10^{-5}$ . The  
223 additional Gp25 K159E mutation in GD(6) increased the EOP further and gave clear plaques on  
224 OmpU G325D. The presence of Gp25 S742P also likely allows both GD(6) and VF(2)R3 to

225 form turbid plaques on OmpU V324F. GD(1)R9 and GD(1)R10 both have novel Gp25 mutations  
226 in addition to S676A and D96N mutations present in GD(1), while GD(1)R11 has a second Gp23  
227 N190K mutation. These new mutations, however, do not result in EOPs on OmpU V324F and  
228 G325D that greatly differ from GD(1) or GD(1)R8 (Figure 3C). These results suggest that Gp23  
229 mutations increase infection in a mostly allele-specific manner with respect to OmpU mutants,  
230 while retaining wild-type infection of WT OmpU.

231 In EOP assays that included five additional OmpU mutants, ICP2 mutants with secondary  
232 Gp23 mutations have modest alterations in host range (Figure 4). The middle 9 rows in Figure 4  
233 show the host range of mutants with secondary Gp23 S188A mutations and the mutants in the  
234 final 12 rows all have a secondary Gp23 S209R mutation. The addition of a secondary Gp23  
235 S188A mutation in VF(2), VF(2)R2, and GD(6)R2 corresponds with an inability to form plaques  
236 on OmpU L319R and S329L. VF(2)R2 and GD(6)R2 were derived from VF(2)R1 and GD(6)R1,  
237 which contain a single Gp25 S742P mutation and could previously infect these strains. VF(2)R3  
238 contains the same single Gp25 S742P mutation and a secondary Gp23 S209R mutation but  
239 retains the ability to infect OmpU S329L and very weak infection of OmpU V324F. In addition  
240 to secondary Gp23 mutations, the presence of novel Gp25 missense mutations may also be  
241 playing a role in the host ranges of the remaining ICP2 mutants.

#### 242 **ICP2 host-range mutants can bind to OmpU mutants**

243 If plaque formation on OmpU V324F and G325D requires direct binding by Gp23 and/or  
244 Gp25, binding to these OmpU alleles should correlate with EOP. We assayed binding over a  
245 period of 24 hours (hrs) to heat-killed host cells and quantified binding as the ratio of remaining  
246 free phage titer to the initial titer at  $t = 0$  hrs. Cells were heat-killed by incubating at 51°C for 12  
247 minutes (min) in a PCR thermocycler. The structure of the cells was unaffected by this treatment

248 as determined by phase-contrast microscopy. WT ICP2 bound to WT *V. cholerae* between 10-  
249 and 100-fold, depending on the experiment, but did not exhibit any OmpU-independent binding  
250 to the  $\Delta ompU$  strain. ICP2 host-range mutants all retain the ability to significantly bind WT *V.*  
251 *cholerae* (Figure 5).

252 VF(2)R1 and GD(1)R1 show no binding to OmpU V324F and G325D (Figure 5),  
253 respectively. Because these phage mutants could form turbid plaques and had low to  
254 intermediate EOPs on these hosts, this suggests that the binding assay is not as sensitive. ICP2  
255 mutants with a Gp23 S188A mutation, GD(6)R2 (Figure 5A), GD(1)R3, and GD(1)R7 (Figure  
256 5B), all bind to OmpU V324F, as expected considering these phage mutants have high EOPs and  
257 form clear plaques. Similarly, VF(2)R3 (Figure 5A), GD(1)R8, GD(1)R9, and GD(1)R11 (Figure  
258 5B) contain Gp23 S209R and bind to OmpU G325D. The one exception to this trend is that  
259 GD(1)R7, despite not forming plaques or having a detectable EOP on OmpU G325D, binds to  
260 both OmpU alleles with a preference for OmpU V324F.

261 In general the host-range mutants bind better to WT cells than to OmpU V324F and  
262 G325D mutants. VF(2)R1 has no detectable binding to either OmpU V324F or G325D.  
263 GD(6)R2 and VF(2)R3 show 99% binding to WT *V. cholerae*, but 95% and 91% binding to  
264 OmpU V324F and G325D, respectively (Figure 5A). Host-range mutants with significant  
265 binding to OmpU V324F or G325D are derived from GD(1)R1 or GD(1)R2 and have an  
266 additional Gp25 mutation (Figures 2B, 5B). The additional Gp23 mutation in GD(1)R11 does  
267 not significantly aide binding to OmpU G325D.

## 268 **ICP2 host-range mutants prey on OmpU mutants in broth culture with varying efficiencies**

269 The binding assays demonstrated that phage predation in broth culture differs from the  
270 slower diffusion of soft agar overlays in that the on-off rate of receptor binding will have a larger

271 impact on the rate of adsorption. Therefore, we conducted predation assays in shaking broth  
272 cultures to examine how the ICP2 phenotypes seen in EOP and binding assays are reflected on  
273 host cell killing. The cell density of early exponential growth phase *V. cholerae* cultures infected  
274 with ICP2 host-range mutants (MOI ~1) was measured as the optical density at 600 nm over 16  
275 hrs at 37°C. As previously reported (8), the negative control  $\Delta ompU$  strain has a slight growth  
276 defect in LB (Figure 6A). All ICP2 host-range mutants prey on WT cells, suppressing  
277 exponential growth for ~6 hrs, followed by a return to exponential growth (Figure 6). Most *V.*  
278 *cholerae* cells replicating after 6 hrs have gained phage resistance (Table S1).

279 In contrast, VF(2)R1, GD(1)R1, and GD(1)R2 do not affect the growth of OmpU V324F  
280 or OmpU G325D (Figure 6A), correlating with their lack of binding as shown in Figure 5. These  
281 host-range mutants did, however, form turbid plaques and had measurable EOPs on these hosts,  
282 presumably due to the slower diffusion of host cells in plaque assays that allows even weak  
283 binding phages to eventually infect cells.

284 ICP2 recombinants with secondary Gp23 mutations specifically prey on either OmpU  
285 V324F or OmpU G325D, but not both. Correlating with the intermediate levels of binding in  
286 Figure 5, secondary Gp23 mutations result in moderate effects on OmpU V324F or OmpU  
287 G325D replication (Figure 6B and C). No host-range mutants tested were able to kill both OmpU  
288 V324F and G325D. VF(2)R2 (biological replicate of GD(6)R2) and VF(2)) blocks OmpU  
289 V324F late exponential phase. GD(1)R3 and GD(1)R7 do not disrupt OmpU G325D growth  
290 consistent with their low EOP (Figure 3B) and weak binding (Figure 5B) on this host.

291 GD(1)R8, GD(1)R9, GD(1)R10, and GD(1)R11 similarly block OmpU G325D late  
292 exponential phase. GD(1)R9 and GD(1)R10 infections lead to a much greater delay than  
293 GD(1)R8, despite all three phages having significant EOPs on OmpU G325D (Figure 3C, 6C).

294 Both GD(1)R9 and GD(1)R8 also bind OmpU G325D (Figure 5B). VF(2)R3 has no impact on  
295 OmpU G325D growth, correlating with its turbid plaque morphology and reduced EOP (Figure  
296 5C). This further reinforces the necessity of the second Gp25 K159E mutation in GD(6).

297

## 298 **Discussion**

### 299 **A model of ICP2 evolution within humans**

300 During *V. cholerae* infection in people, the presence of ICP2 phage in the intestinal tract  
301 imposes selective pressure, resulting in the appearance of phage escape mutants with mutations  
302 in the OmpU receptor. In this scenario, we hypothesize that ICP2 *gp25* mutations are initially  
303 selected for increased generalized binding to several OmpU mutants. This generalized binding  
304 allows for minimal infection of some OmpU mutant hosts, expanding these phage mutants in the  
305 population. Further selection for secondary *gp23* mutations allows for more efficient infection of  
306 specific OmpU alleles but comes with the risk of a limited host-range. For example, phages with  
307 Gp23 S188A mutations have a narrow host-range and only five of the nine mutants gained an  
308 appreciable ability to plaque on one to two additional OmpU alleles. Phages with Gp23 S209R  
309 mutations have a wider host-range, with ten of 12 mutants gaining the ability to plaque on three  
310 or four additional OmpU alleles.

311 *V. cholerae* forces ICP2 to generate a variety of different *gp25* and *gp23* mutations, while  
312 tempering fitness costs to itself by maintaining a population of functional OmpU alleles (8). This  
313 model parallels the one described by DeSordi et al. (25) in which phages infect “intermediate”  
314 hosts in the microbiome while evolving towards an expanded host-range. Initial ICP2 host-range  
315 mutants with *gp25* mutations are in the process of “jumping” between different OmpU alleles as

316 intermediate hosts. Further studies need to be done to determine if this selective process involves  
317 infection processes downstream of OmpU binding, such as DNA injection or virion assembly.

### 318 **A model of ICP2 tail fiber structure**

319 Speculation into ICP2 tail fiber structure can be made based on the step-wise evolution of  
320 Gp25 and Gp23 and current literature on phage tail fibers and receptor binding proteins (RBPs).  
321 Although morphologically in the *Podoviridae* family (7), ICP2 Gp23, Gp24, and Gp25 show  
322 surprising similarity to T-even tail fibers in the *Myoviridae* family. Gp25 contains putative  
323 collagen-like domains that likely form a triple helical structure, as seen in many other phage tail  
324 fibers (26, 27). Gp25 also has a tail tube attachment domain with homology to several other  
325 podoviruses (23). Homology analysis via Phyre2 (28) and Hardies et al. (23) revealed that Gp24  
326 has regions very similar to P5 of T4 Gp34 and T4 Gp36 (29). P5 Gp34 is one domain of the T4  
327 long tail fiber closest to the phage baseplate. T4 Gp35 and Gp36 make up the “knee” of the T4  
328 tail long tail fiber (29). None of our ICP2 host-range mutants have Gp24 mutations. Gp23 has  
329 both structural (23) and functional homology to T-even adhesins that modulate receptor  
330 specificity, such as S16 Gp38 and T4 Gp37 and Gp38 (29-31), suggesting it is the RBP for ICP2.

331 We hypothesize that *gp25* encodes the long portion of the tail fiber attached to the ICP2  
332 tail tube. Gp25 host-range mutations possibly allow for more permissive receptor binding by  
333 Gp23 by altering tail fiber conformation and therefore adsorption. Furthermore Gp25 and Gp23  
334 may interact with independent portions of OmpU or receptors, one of which must be OmpU,  
335 altogether. Gp24 makes up the lower long “shin” of a tail fiber and is then distally bound by  
336 Gp23, which lies at the tip of each tail fiber. Biochemical and structural studies will be needed to  
337 verify this ICP2 tail fiber model. ICP2 Gp14 also has tail fiber homology (23), and we often find  
338 missense mutations in this gene, but without selective pressures other than maintaining viability

339 during storage at 4°C (Table S1). Gp14 mutations do not impact Gp23 and Gp25 interactions  
340 with OmpU.

341

## 342 **Application**

343 We have yet to find a secondary receptor for ICP2 and the experiments in this study show  
344 that ICP2 is dependent on OmpU as its primary receptor. OmpU is a key *V. cholerae* virulence  
345 factor (8, 32), limiting its ability to mutate without fitness costs. Our lab has previously shown  
346 that a phage cocktail containing ICP1, ICP2, and ICP3 can be used as prophylaxis in two animal  
347 models of *V. cholerae* infection (33). In this therapeutic context, these arms-race limitations help  
348 ensure both the specificity and efficacy of ICP2.

349

## 350 **Materials and Methods**

### 351 **Strain construction**

352 A mutator strain of *V. cholerae*, designated AC6727 (Table 1), was constructed by  
353 moving marked deletions of *mutS* and the K139 prophage into the rough mutant, AC4653, by  
354 natural transformation (34). Genomic DNA was purified from strain AC5218 and transformed  
355 into AC4653 with selection for spectinomycin resistance (Sp<sup>R</sup>). Next, a K139-*att* marked  
356 deletion was constructed using splicing-by-overlap-extension (SOE) PCR (2), and transformed  
357 into the *wbeL mutS* double mutant with selection for kanamycin resistance (Km<sup>R</sup>). The SOE PCR  
358 primers (listed 5' to 3') used were: CCATATAACAACCTAGCTTCGGC,  
359 GCTAATACAACATTGAGCCTTGGTG, GGTTCTCTCGCGTTTTACCCCCACCTTTATC,  
360 GGGTAAAACGCGAGAGAACCGGGGCTATTTG, CCAGGCTTTACACTTTATGCTTCC,  
361 CCCGTCCTAAAACAATTCATCCAG,



362 GGAAGCATAAAGTGTAAGCCTGGGCGTTTTACCCCCACCTTTATC, and  
363 CTGGATGAATTGTTTTAGGACGGGGAGAGAACCGGGGCTATTTG. Strains, phages, and  
364 plasmids are listed in Table 1.

### 365 **Bacteriophage isolation and propagation**

366 ICP2\_2013\_A\_Haiti (ICP2) and derivatives were propagated on early exponential growth  
367 phase wild-type (WT) *V. cholerae* E7946 (35) growing in Luria Bertani Miller (LB) broth  
368 supplemented with streptomycin (100 µg/ ml) at 37°C with aeration. After 3-4 hrs the lysates  
369 were centrifuged at  $7197 \times g$  for 5 min at room temperature (RT) to pellet remaining cells and  
370 debris. The supernatants were filtered through 0.22 µm filters and stored as high-titer stocks at  
371 4°C. Stocks were passaged via liquid culture no more than three times to prevent the selection  
372 and accumulation of possible mutants. ICP2 stocks were also regularly whole-genome sequenced  
373 to authenticate.

374 Bacteriophage stocks were titered by plaque assay on WT *V. cholerae* within three weeks  
375 of being used in experiments. 10 µl of 10-fold serial dilutions of each stock were spotted onto LB  
376 0.3% soft agarose overlays containing approximately  $5 \times 10^7$  CFU of WT cells and then dribbled  
377 across by tilting the plate. Plates were incubated at 37°C overnight (12-18 hrs).

### 378 **Genetic analysis of phage isolates**

379 Phage gDNA was isolated from high-titer phage stocks by first pretreating with DNase I  
380 and RNase A to hydrolyze contaminating host DNA and RNA. Bacteriophage gDNA was then  
381 isolated via phenol-chloroform extraction, or using the DNEasy Blood & Tissue kit (Qiagen)  
382 according to the kit instructions and including the optional Proteinase K treatment. DNA samples  
383 were prepared for sequencing on an Illumina HiSeq2500 using the Nextera XT Kit (Illumina).  
384 CLC Genomic Workbench (Version 20, Qiagen) was used to map the resulting reads to the

385 ICP2\_2013\_A\_Haiti genome ([NC\\_024791.1](#)), and mutations were detected using basic variant  
386 detection (Table S2) .

### 387 **Selection of ICP2 host-range mutants during intestinal infection**

388 All animal experiments were done in accordance with the rules of the Comparative  
389 Medicine Services at Tufts University and the Institutional Animal Care and Use Committee. 3-  
390 day old infant rabbits were pre-treated with Cimetidine-HCL (Morton Grove Pharmaceuticals) 3  
391 hrs prior to infection (36) and orally inoculated with  $5 \times 10^8$  CFU of *V. cholerae* in 2.5% sodium  
392 bicarbonate (pH 9). A 10:1 mixture of WT to OmpU mutant was used.  $5 \times 10^6$  PFU of ICP2 was  
393 added to the bacteria immediately before inoculation to limit phage adsorption *ex vivo*. Rabbits  
394 were euthanized 12 hrs post-inoculation and cecal fluid was collected by dissection and puncture.

### 395 **Selection of ICP host-range mutants *in vitro***

396 A mutagenized pool of ICP2 was generated by preparing two independent high-titer  
397 stocks on the *V. cholerae* mutator strain AC6727. Selection was performed on each ICP2 stock  
398 by adding  $10^{10}$  PFU to a 1 L, mid-exponential phase, 37°C LB broth culture of *V. cholerae*  
399 OmpU A182\_T193dup. Infection was allowed to proceed overnight. Free phage were purified  
400 from the culture supernatant by PEG precipitation. A second, identical selection was performed  
401 using the pool of phage purified from each first round selection. Host-range mutants were  
402 screened for by plaque assay on the OmpU A182\_T193dup mutant. Clear plaque mutants were  
403 isolated after each of the second selections, but not from either first selection. Four plaques from  
404 each independent selection were plaque-purified on the OmpU A182\_T193dup strain. ATdup(1)  
405 was isolated from one infection, while ATdup(2) and ATdup(3) were isolated from a second  
406 independent infection.

### 407 **Homologous recombination of ICP2 *gp23* and *gp25* mutations**

408 Mutant alleles of *gp23* and *gp25* from ICP2 host-range mutants were amplified via PCR  
409 and cloned into an ampicillin-resistant plasmid, pDL1201 (Figure S3) by blunt-end ligation  
410 (Blunt/TA Ligase Master Mix, New England Biolabs). Mutations in *gp23* or *gp25* were cloned  
411 into separate plasmids. In order to mitigate toxicity in *Escherichia coli* and *V. cholerae*,  
412 amplified fragments excluded the start and stop codons of *gp23* and *gp25*, and the intervening  
413 gene, *gp24*, was replaced with a kanamycin resistance gene (*neo*). *Neo* also separated  
414 recombination events occurring within *gp23* and *gp25*. Additionally, the *gp23-neo-gp25*  
415 fragment was fused to a *LacZ $\alpha$*  complementing fragment and downstream of a tight arabinose  
416 promoter. Recombinant plasmids were first transformed into chemically competent TG1, then  
417 moved into *E. coli* SM10( $\lambda$ pir) by electroporation, and finally mated into WT *V. cholerae* or the  
418  $\Delta$ K139 strain, AC6034. Use of a  $\Delta$ K139 strain was done to prevent contamination of ICP2  
419 stocks with the K139 temperate phage, which can spontaneously undergo prophage activation.

420 Plasmid-containing *V. cholerae* strains were grown to early-exponential phase in LB  
421 supplemented with ampicillin and/or kanamycin (50 or 100  $\mu$ g/ml), infected with ICP2 and then  
422 incubated at 37°C for 4-5 hours with aeration. During phage multiplication, recombination with  
423 the resident plasmid alleles of *gp23* or *gp25* could occur. The high-titer phage stocks from these  
424 infections contained both WT and recombinant ICP2.

#### 425 **Host-range and efficiency-of-plaquing (EOP) assays**

426 Stocks of each phage were serially diluted 10-fold and dribbled across (10  $\mu$ l) or spotted  
427 on (5  $\mu$ l) soft agarose overlays containing either WT *V. cholerae* or an OmpU mutant strain. The  
428 plates were incubated at 37°C overnight and PFU were counted. Overlays containing *V. cholerae*  
429  $\Delta$ *ompU* were included as negative controls representing the absence of plaque formation and to  
430 rule out contamination by other phages used in the lab. The EOP of ICP2 host-range mutants was

431 calculated as the ratio of PFU on an OmpU mutant divided by PFU on WT. EOPs below 1  
432 indicate that an ICP2 mutant cannot infect a mutant OmpU strain as well as it can infect WT.  
433 EOPs were averaged from 2-5 replicate infections. Host-range and EOP assays were scanned to  
434 better visualize small and/or turbid plaques (EPSON Scan Version 3.25A).

### 435 **Phage binding assays**

436 Mid-exponential phase cultures of WT *V. cholerae* and OmpU receptor mutant strains  
437 were washed and resuspended in LB broth. Each strain was diluted to  $OD_{600} = 0.1$  in 200  $\mu$ l ( $\sim 2$   
438  $\times 10^7$  CFU) in PCR tubes (USA Scientific, 1402-4700). Three replicates of each strain were  
439 heat-killed at 51°C for 12 min and cooled to 37°C for 2 min in a thermocycler and then cooled to  
440 RT before adsorption. Examination using a phase-contrast microscope showed that the heating  
441 process did not lyse or disrupt the morphology of the cells. Bacteriophage were added to heat-  
442 killed cells at a multiplicity of infection (MOI) of 0.1 ( $\sim 2 \times 10^6$  PFU). After the addition of  
443 phage and mixing, 90  $\mu$ l were immediately removed and then serially diluted in LB broth to  
444 generate a set of samples representing  $t = 0$  hrs of binding. Each dilution series was dribble  
445 plated on a soft agarose overlay of WT *V. cholerae*. The remainder of the samples were  
446 incubated at RT for 24 hour. After incubation these samples were serially diluted and dribble  
447 plated as above. Plates were incubated at 37°C overnight. Binding efficiency was determined as  
448 the ratio of PFU at  $t = 24$  hrs to PFU at  $t = 0$  hrs.

449 Before addition to heat-killed cells, phage stocks with titers below  $5 \times 10^8$  PFU/ml were  
450 extracted with 1-octanol to remove LPS (37, 38) and preheated for 1 hr at 37°C to mitigate  
451 discrepancies caused by phage disaggregation at RT. This was not necessary for higher titer  
452 phage stocks that required 1:10 or 1:100 dilution before addition to heat-killed cells. 1-octanol  
453 extraction and preheating did not affect phage predation (Figure S2).

454 **Phage predation killing assays**

455 In a 96-well plate, 100  $\mu$ l of washed mid-exponential phase *V. cholerae* cells diluted to an  
456  $OD_{600} = 0.2$  were infected with  $2 \times 10^7$  PFU (MOI = 1) in 100  $\mu$ l of LB broth supplemented with  
457 100  $\mu$ g/ml of streptomycin (total volume per well = 200  $\mu$ l). No-phage controls were included to  
458 account for growth differences between the host strains. Infections were done in technical  
459 triplicate and incubated at 37°C, with shaking at 205 rpm in a plate reader (BioTeK, Synergy  
460 H1).  $OD_{600}$  was measured every 5 min over 16 hours. This assay was conducted twice for phage  
461 mutants without a genetic replicate (Figure S1).

462

463 **Acknowledgments**

464 This work was supported by NIH grants GM007310 (ANWL), AI055058 (AC), and AI147658  
465 (AC). AC and MY are associated with and have a financial interest in PhagePro Inc. which is  
466 developing a phage cocktail product for prevention of cholera.

467 **References**

- 468 1. Adhya S, Merril C. 2006. The road to phage therapy. *Nature* 443:754–755.
- 469 2. Letchumanan V, Chan K-G, Pusparajah P, Saokaew S, Duangjai A, Goh B-H, Ab Mutalib  
470 N-S, Lee L-H. 2016. Insights into Bacteriophage Application in Controlling *Vibrio*  
471 Species. *Front Microbiol* 7:66–15.
- 472 3. Das B, Verma J, Kumar P, Ghosh A, Ramamurthy T. 2020. Antibiotic resistance in *Vibrio*  
473 *cholerae*: Understanding the ecology of resistance genes and mechanisms. *Vaccine*  
474 38:A83–A92.
- 475 4. Wittebole X, De Roock S, Opal SM. 2014. A historical overview of bacteriophage therapy  
476 as an alternative to antibiotics for the treatment of bacterial pathogens. *Virulence* 5:226–  
477 235.
- 478 5. Faruque SM, Naser IB, Islam MJ, Faruque ASG, Ghosh AN, Nair GB, Sack DA,  
479 Mekalanos JJ. 2005. Seasonal epidemics of cholera inversely correlate with the prevalence  
480 of environmental cholera phages. *Proc Natl Acad Sci U S A* 102:1702–1707.
- 481 6. Faruque SM, Islam MJ, Ahmad QS, Faruque ASG, Sack DA, Nair GB, Mekalanos JJ.  
482 2005. Self-limiting nature of seasonal cholera epidemics: Role of host-mediated  
483 amplification of phage. *Proc Natl Acad Sci U S A* 102:6119–6124.
- 484 7. Seed KD, Bodi KL, Kropinski AM, Ackermann H-W, Calderwood SB, Qadri F, Camilli  
485 A. 2011. Evidence of a dominant lineage of *Vibrio cholerae*-specific lytic bacteriophages  
486 shed by cholera patients over a 10-year period in Dhaka, Bangladesh. *mBio* 2:e00334–10.
- 487 8. Seed KD, Yen M, Shapiro BJ, Hilaire IJ, Charles RC, Teng JE, Ivers LC, Boney J, Harris  
488 JB, Camilli A. 2014. Evolutionary consequences of intra-patient phage predation on  
489 microbial populations. *eLife* 3:e03497.

- 490 9. Mathur J, Waldor MK. 2004. The *Vibrio cholerae* ToxR-Regulated Porin OmpU Confers  
491 Resistance to Antimicrobial Peptides. *Infection and Immunity* 72:3577–3583.
- 492 10. Sakharwade SC, Mukhopadhaya A. 2015. *Vibrio cholerae* porin OmpU induces LPS  
493 tolerance by attenuating TLR-mediated signaling. *Molecular Immunology* 1–13.
- 494 11. DiRita VJ, Parsot C, Jander G, Mekalanos JJ. 1991. Regulatory cascade controls virulence  
495 in *Vibrio cholerae*. *Proc Natl Acad Sci U S A* 88:5403–5407.
- 496 12. Sperandio V, Giron JA, Silveira WD, Kaper JB. 1995. The OmpU outer membrane  
497 protein, a potential adherence factor of *Vibrio cholerae*. *Infection and Immunity* 63:4433–  
498 4438.
- 499 13. Wibbenmeyer JA, Provenzano D, Landry CF, Klose KE, Delcour AH. 2002. *Vibrio*  
500 *cholerae* OmpU and OmpT porins are differentially affected by bile. *Infection and*  
501 *Immunity* 70:121–126.
- 502 14. Ante VM, Bina XR, Howard MF, Sayeed S, Taylor DL, Bina JE. 2015. *Vibrio cholerae*  
503 *leuO* Transcription Is Positively Regulated by ToxR and Contributes to Bile Resistance. *J*  
504 *Bacteriol* 197:3499–3510.
- 505 15. Merrell DS, Bailey C, Kaper JB, Camilli A. 2001. The ToxR-Mediated Organic Acid  
506 Tolerance Response of *Vibrio cholerae* Requires OmpU. *J Bacteriol* 183:2746–2754.
- 507 16. Li H, Zhang W, Dong C. 2018. Crystal structure of the outer membrane protein OmpU  
508 from *Vibrio cholerae* at 2.2 Å resolution. *Acta Crystallogr D Struct Biol* 74:21–29.
- 509 17. Pathania M, Acosta-Gutierrez S, Bhamidimarri SP, Baslé A, Winterhalter M, Ceccarelli  
510 M, van den Berg B. 2018. Unusual Constriction Zones in the Major Porins OmpU and  
511 OmpT from *Vibrio cholerae*. *Structure* 26:708–721.e4.

- 512 18. Zhang Y. 2008. I-TASSER server for protein 3D structure prediction. BMC  
513 Bioinformatics 9:40.
- 514 19. Roy A, Kucukural A, Zhang Y. 2010. I-TASSER: a unified platform for automated  
515 protein structure and function prediction. Nature Protocols 5:725–738.
- 516 20. Yang J, Yan R, Roy A, Xu D, Poisson J, Zhang Y. 2015. The I-TASSER Suite: protein  
517 structure and function prediction. Nat Meth 12:7–8.
- 518 21. McNair K, Aziz RK, Pusch GD, Overbeek R, Dutilh BE, Edwards R. 2017. Phage  
519 Genome Annotation Using the RAST Pipeline, pp. 231–238. *In* Bacteriophages. Springer  
520 New York, New York, NY.
- 521 22. Aziz RK, Bartels D, Best AA, DeJongh M, Disz T, Edwards RA, Formsma K, Gerdes S,  
522 Glass EM, Kubal M, Meyer F, Olsen GJ, Olson R, Osterman AL, Overbeek RA, McNeil  
523 LK, Paarmann D, Paczian T, Parrello B, Pusch GD, Reich C, Stevens R, Vassieva O,  
524 Vonstein V, Wilke A, Zagnitko O. 2008. The RAST Server: Rapid Annotations using  
525 Subsystems Technology. BMC Genomics 9:75–15.
- 526 23. Hardies SC, Thomas JA, Black L, Weintraub ST, Hwang CY, Cho BC. 2016.  
527 Identification of structural and morphogenesis genes of Pseudoalteromonas phage  $\phi$ RIO-1  
528 and placement within the evolutionary history of *Podoviridae*. Virology 489:116–127.
- 529 24. Dalia AB, McDonough E, Camilli A. 2014. Multiplex genome editing by natural  
530 transformation. Proc Natl Acad Sci USA 111:8937.
- 531 25. De Sordi L, Khanna V, Debarbieux L. 2017. The Gut Microbiota Facilitates Drifts in the  
532 Genetic Diversity and Infectivity of Bacterial Viruses. Cell Host and Microbe 1–23.



- 533 26. Rasmussen M, Jacobsson M, Björck L. 2003. Genome-based identification and analysis of  
534 collagen-related structural motifs in bacterial and viral proteins. *J Biol Chem* 278:32313–  
535 32316.
- 536 27. Engel J, Bächinger HP. 1999. Collagen-like sequences in phages and bacteria.  
537 *Proceedings of the Indian Academy of Sciences - Chemical Sciences* 111:81–86.
- 538 28. Mezulis S, Yates CM, Wass MN, Sternberg MJE, Kelley LA. 2019. The Phyre2 web  
539 portal for protein modeling, prediction and analysis. *Nature Protocols* 1–14.
- 540 29. Granell M, Namura M, Alvira S, Kanamaru S, van Raaij M. 2017. Crystal Structure of the  
541 Carboxy-Terminal Region of the Bacteriophage T4 Proximal Long Tail Fiber Protein  
542 Gp34. *Viruses* 9:168–12.
- 543 30. Dunne M, Denyes JM, Arndt H, Loessner MJ, Leiman PG, Klumpp J. 2018. *Salmonella*  
544 Phage S16 Tail Fiber Adhesin Features a Rare Polyglycine Rich Domain for Host  
545 Recognition. *Structure* 26:1573–1582.e4.
- 546 31. Trojet SN, Caumont-Sarcos A, Perrody E, Comeau AM, Krisch HM. 2011. The gp38  
547 Adhesins of the T4 Superfamily: A Complex Modular Determinant of the Phage’s Host  
548 Specificity. *Genome Biology and Evolution* 3:674–686.
- 549 32. Lee SH, Hava DL, Waldor MK, Camilli A. 1999. Regulation and temporal expression  
550 patterns of *Vibrio cholerae* virulence genes during infection. *Cell* 99:625–634.
- 551 33. Yen M, Cairns LS, Camilli A. 2017. A cocktail of three virulent bacteriophages prevents  
552 *Vibrio cholerae* infection in animal models. *Nat Commun* 8:1–7.
- 553 34. Meibom KL, Blokesch M, Dolganov NA, Wu C-Y, Schoolnik GK. 2005. Chitin induces  
554 natural competence in *Vibrio cholerae*. *Science* 310:1824–1827.

- 555 35. Levine MM, Black RE, Clements ML, Cisneros L, Saah A, Nalin DR, Gill DM, Craig JP,  
556 Young CR, Ristaino P. 1982. The Pathogenicity of Nonenterotoxigenic *Vibrio cholerae*  
557 Serogroup O1 Biotype El Tor Isolated from Sewage Water in Brazil. *Journal of Infectious*  
558 *Diseases* 145:296–299.
- 559 36. Kamp HD, Patimalla-Dipali B, Lazinski DW, Wallace-Gadsden F, Camilli A. 2013. Gene  
560 Fitness Landscapes of *Vibrio cholerae* at Important Stages of Its Life Cycle. *PLoS Pathog*  
561 9:e1003800.
- 562 37. Bonilla N, Rojas MI, Netto Flores Cruz G, Hung S-H, Rohwer F, Barr JJ. 2016. Phage on  
563 tap—a quick and efficient protocol for the preparation of bacteriophage laboratory stocks.  
564 *PeerJ* 4:e2261–18.
- 565 38. Szermer-Olearnik B, Boratyński J. 2015. Removal of Endotoxins from Bacteriophage  
566 Preparations by Extraction with Organic Solvents. *PLoS One* 10:e0122672–10.
- 567 39. Sack RB, Miller CE. 1969. Progressive changes of *Vibrio* serotypes in germ-free mice  
568 infected with *Vibrio cholerae*. *J Bacteriol* 99:688–695.
- 569 40. Schild S, Nelson EJ, Camilli A. 2008. Immunization with *Vibrio cholerae* outer  
570 membrane vesicles induces protective immunity in mice. *Infection and Immunity*  
571 76:4554–4563.
- 572 41. Seed KD, Faruque SM, Mekalanos JJ, Calderwood SB, Qadri F, Camilli A. 2012. Phase  
573 Variable O Antigen Biosynthetic Genes Control Expression of the Major Protective  
574 Antigen and Bacteriophage Receptor in *Vibrio cholerae* O1. *PLoS Pathog* 8:e1002917.  
575

| Table 1. Bacterial strains, phages, and plasmids |                                                                                                                      |                |
|--------------------------------------------------|----------------------------------------------------------------------------------------------------------------------|----------------|
| Strain, plasmid, or phage                        | Description                                                                                                          | Source         |
| WT                                               | <i>Vibrio cholerae</i> O1 El Tor Ogawa E7946 (Sm <sup>R</sup> )                                                      | (39)           |
| AC2846                                           | E7946 $\Delta ompU$                                                                                                  | (40)           |
| AC6034                                           | E7946 $\Delta K139$ prophage                                                                                         | Lab collection |
| KS714                                            | E7946 $\Delta lacZ::Kan^R$ , OmpU A182_T193dup                                                                       | This study     |
| KS769                                            | E7946 $\Delta lacZ::Kan^R$ , OmpU V324F                                                                              | This study     |
| KS784                                            | E7946 $\Delta lacZ::Kan^R$ , OmpU A196_Y198dup                                                                       | This study     |
| KS785                                            | E7946 $\Delta lacZ::Spec^R$ , OmpU A195T                                                                             | This study     |
| KS823                                            | E7946 $\Delta lacZ::Spec^R$ , OmpU L319R                                                                             | (8)            |
| KS824                                            | E7946 $\Delta lacZ::Spec^R$ , OmpU S329L                                                                             | (8)            |
| KS825                                            | E7946 $\Delta lacZ::Spec^R$ , OmpU N158Y                                                                             | (8)            |
| KS745                                            | E7946 OmpU G325D                                                                                                     | (8)            |
| KS667                                            | E7946 OmpU A196_Y198dup                                                                                              | (8)            |
| KS658                                            | E7946 OmpU A195T                                                                                                     | (8)            |
| KS672                                            | E7946 OmpU V324F                                                                                                     | (8)            |
| KS822                                            | E7946 OmpU A182_T193dup, $\Delta lacZ::Spec^R$                                                                       | (8)            |
| AC4653                                           | E7469 $\Delta wbeL$ (Sm <sup>R</sup> )                                                                               | (41)           |
| AC5218                                           | E7469 $\Delta mutS::aad9$ (Sm <sup>R</sup> , Sp <sup>R</sup> )                                                       | (24)           |
| AC6727                                           | E7946 $\Delta wbeL \Delta K139-att::aph \Delta mutS::aad9$<br>(Sm <sup>R</sup> , Km <sup>R</sup> , Sp <sup>R</sup> ) | This study     |
| AC5981                                           | <i>E. coli</i> TG1                                                                                                   | Lab collection |
| AC89                                             | <i>E. coli</i> Sm10 $\lambda$ pir                                                                                    | Lab collection |
| pDL1201                                          | Plasmid backbone for recombination (Amp <sup>R</sup> )                                                               | Lab collection |
| pDL1201_gp23-Kan-25                              | pDL1201_gp23-neo-gp25                                                                                                | This study     |
| pDL1201_23_GD(6)                                 | pDL1201_gp23(209R)-neo-gp25                                                                                          | This study     |
| pDL1201_23_VF(2)                                 | pDL1201_gp23(S188A)-neo-gp25                                                                                         | This study     |
| pDL1201_25_GD(1)                                 | pDL1201_gp23-neo-gp25(D96N, S676A)                                                                                   | This study     |
| pDL1201_25_GD(6)                                 | pDL1201_gp23-neo-gp25(K159E and S742P)                                                                               | This study     |
| pDL1201_25_VF(2)                                 | pDL1201_gp23-neo-gp25(S742P)                                                                                         | This study     |

|      |                                 |     |
|------|---------------------------------|-----|
| ICP2 | ICP2_2013_A_Haiti (NC_024791.1) | (8) |
|------|---------------------------------|-----|

576

577

578 **Figures**

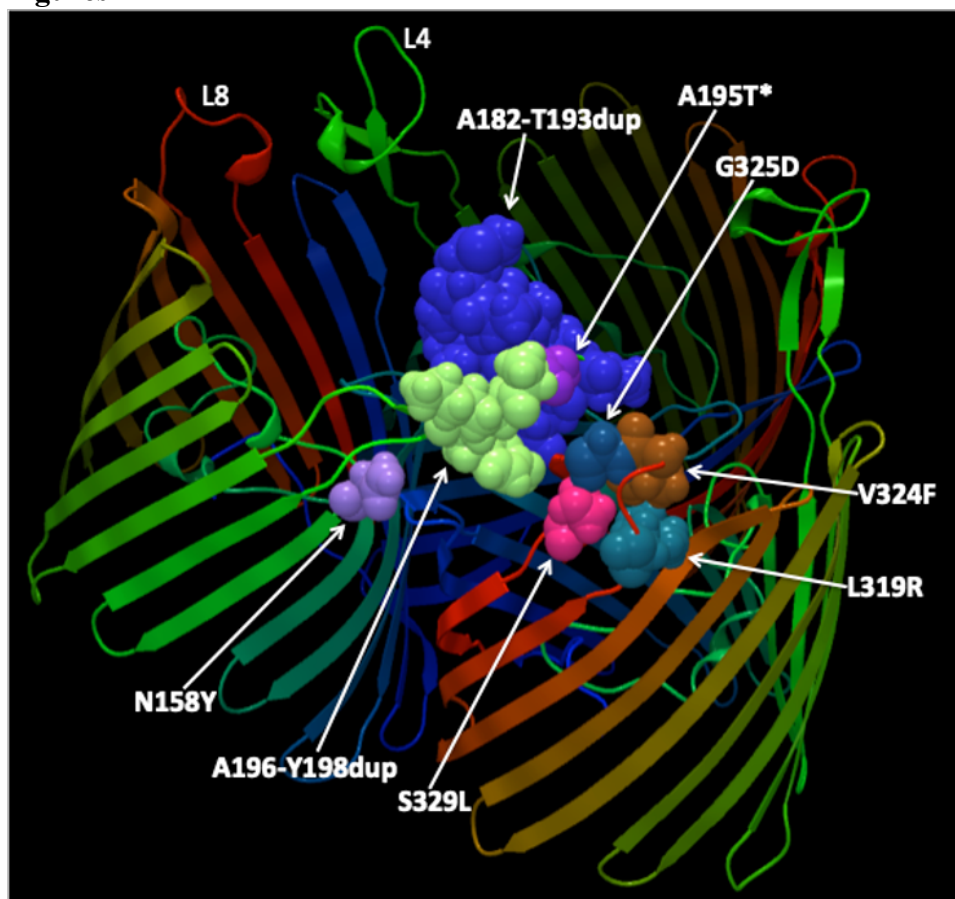

579 **Figure 1. Location of mutated amino acid residues in the OmpU structure that give rise to**  
580 **ICP2-resistance.** OmpU mutations previously shown to confer ICP2 resistance (8) map to  
581 extracellular loops L4 and L8 on the structure solved by Li et al. (16). The OmpU porin is a  
582 homotrimer of three β-barrels. Mutations are highlighted on two adjacent monomers to  
583 emphasize their proximity. \*Mutation A195T only confers partial resistance to ICP2 (8). This  
584 image does not depict how these mutations may affect OmpU structure.  
585

586

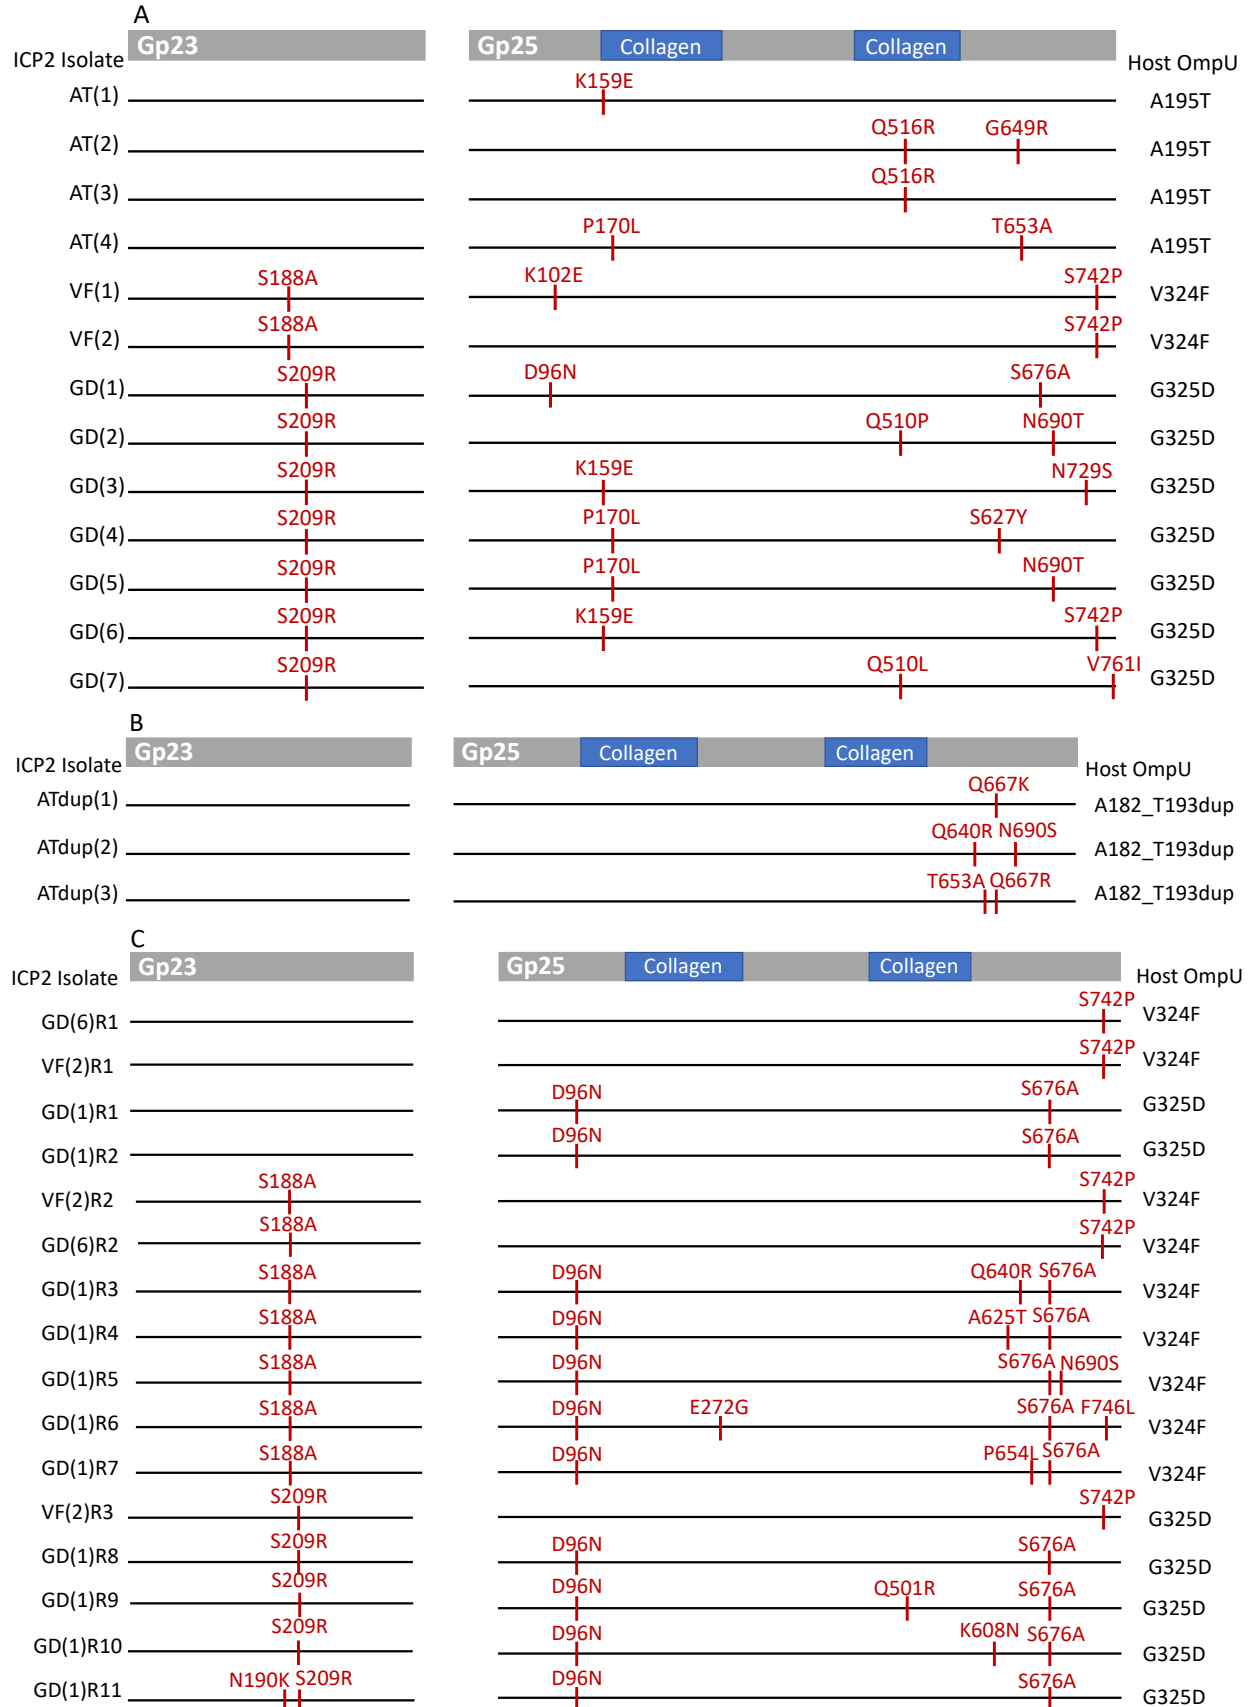

588 **Figure 2. ICP2 host-range mutants have missense mutations in *gp23* and *gp25*.** Thick grey  
589 bars represent the WT amino acid sequence of Gp23 and Gp25, with putative domains indicated  
590 where possible. Each pair of thin horizontal lines represents the Gp23 and Gp25 of a single ICP2  
591 mutant (denoted on the left). The mutations present in each isolate are above their corresponding  
592 red tick marks. The OmpU allele that each phage mutant was isolated on is indicated on the  
593 right. **(A)** ICP2 host-range mutants isolated from the cecal fluid of infant rabbit co-infections had  
594 mutations in *gp23* and *gp25*. **(B)** ICP2 host-range mutants selected *in vitro* on OmpU  
595 A182\_T193dup had mutations in *gp25*. **(C)** Recombinant ICP2 host-range mutants were  
596 generated *in vitro* through sequential infections of WT *V. cholerae* strains carrying plasmids with  
597 specific *gp23* or *gp25* mutations. Mutants were selected based on their ability to form plaques on  
598 either OmpU V324F or OmpU G325D. Gp25 mutations were derived from VF(2), GD(1), and  
599 GD(6). Either Gp23 S188A or S209R was then added to these mutants. Several isolates derived  
600 from GD(1) acquired one or two novel mutations during the second recombination infection.

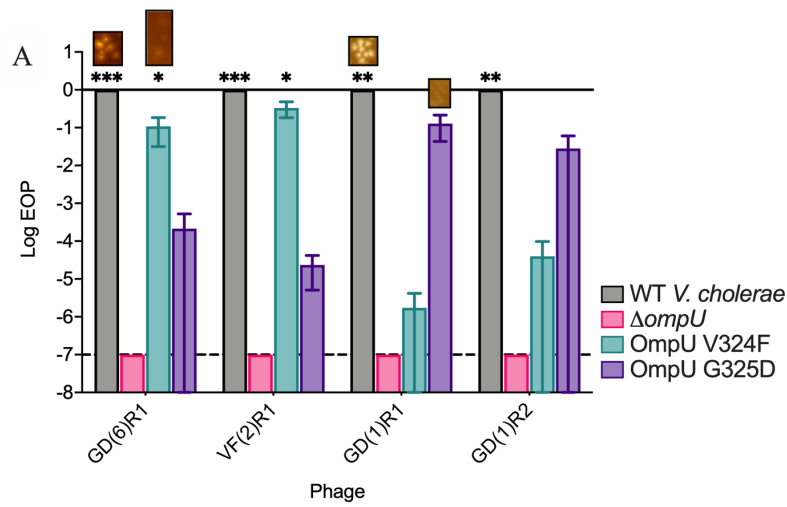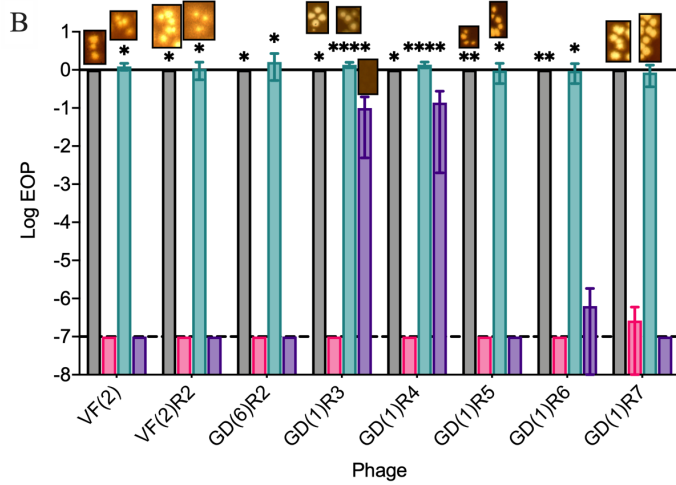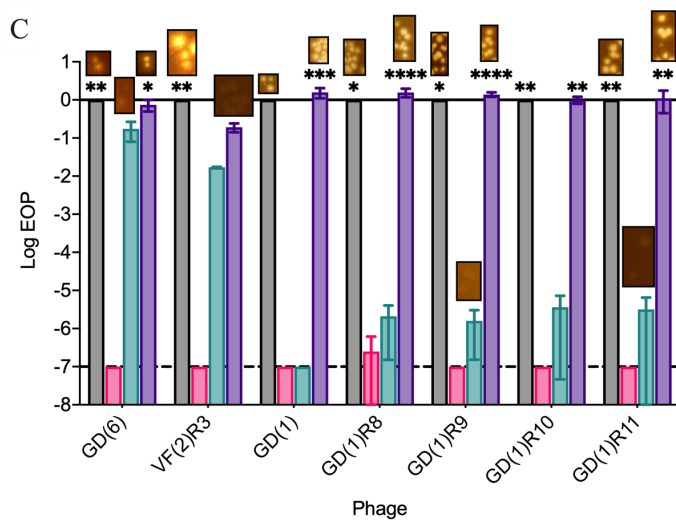



602 **Figure 3. Efficiency of Plaquing of ICP2 host-range mutants on OmpU V324F and G325D.**

603 EOPs were determined relative to that on WT *V. cholerae*. EOP assays were done in at least  
604 quadruplicate with a starting titer of  $\sim 10^8$  PFU/ml. The dotted line represents the limit of  
605 detection and the bars and vertical lines show mean and standard deviation. No data points were  
606 included for plaques that were too turbid to count. Examples of plaque morphology are shown  
607 above their associated bars. Plaque assays were scanned using Epson scan (V. 3.25A) with  
608 adjustments made to contrast and histogram input and output to best visualize turbid plaques.  
609 Scanner settings were kept the same for all plates in a single replicate. Statistical significance  
610 was determined relative to no plaque formation on  $\Delta ompU$  (Ordinary one-way ANOVA and *post*  
611 *hoc* Dunnett's multiple comparisons test on log-transformed data points). (\*  $P \leq 0.05$ , \*\*  $P \leq$   
612  $0.01$ , \*\*\*  $P \leq 0.001$ , \*\*\*\*\*  $P \leq 0.0001$ ) **(A)** Recombinant ICP2 mutants with only one or two  
613 Gp25 mutations form turbid plaques on OmpU V324F or OmpU G325D. They also retain the  
614 ability to form clear plaques on WT cells. Recombinant isolates GD(6)R1 and VF(2)R1 each  
615 have a Gp25 S742P mutation. Recombinant isolates GD(1)R1 and GD(1)R2 contain the two  
616 Gp25 mutations found in GD(1). **(B)** ICP2 host-range mutants with secondary Gp23 S188A  
617 mutations form clear plaques on OmpU V324F and have EOPs near 1, regardless of their Gp25  
618 mutations. Recombinant isolates GD(1)R3 and GD(1)R4 retain the ability to weakly infect  
619 OmpU G325D. **(C)** ICP2 host-range mutants with secondary Gp23 S209R mutations have  
620 increased EOPs on OmpU G325D, regardless of their Gp25 mutations.

| ICP2 Isolate | Host OmpU |       |       |       |       |       |            |            |
|--------------|-----------|-------|-------|-------|-------|-------|------------|------------|
|              | WT Vc     | G325D | V324F | N158Y | L319R | S329L | A196_Y198d | A182_T193d |
| WT           |           |       |       |       |       |       |            |            |
| AT(1)        |           |       |       |       |       |       |            | ★          |
| AT(2)        |           | ★     | ★     |       |       |       |            |            |
| AT(3)        |           |       |       |       |       |       | ★          |            |
| AT(4)        |           |       |       |       |       |       | ★          |            |
| GD(6)R1      |           |       |       |       |       |       |            |            |
| VF(2)R1      |           |       |       |       |       |       |            |            |
| GD(1)R1      |           |       |       |       |       |       | ★          |            |
| GD(1)R2      |           |       |       |       |       |       | ★          |            |
| ATdup(1)     |           |       |       |       |       |       |            |            |
| ATdup(2)     |           |       |       |       |       |       |            |            |
| ATdup(3)     |           |       |       |       |       |       |            |            |
| VF(1)        |           |       |       |       |       |       |            |            |
| VF(2)        |           |       |       |       |       |       |            |            |
| VF(2)R2      |           |       |       |       |       |       |            |            |
| GD(6)R2      |           |       |       |       |       |       |            |            |
| GD(1)R3      |           |       |       | ★     |       |       |            |            |
| GD(1)R4      |           |       |       |       |       |       |            |            |
| GD(1)R5      |           |       |       |       |       |       |            |            |
| GD(1)R6      |           |       |       |       |       |       |            |            |
| GD(1)R7      |           |       |       |       |       |       |            |            |
| GD(1)        |           |       |       |       |       |       |            |            |
| GD(2)        |           |       |       | ★     |       |       |            |            |
| GD(3)        |           |       |       | ★     |       |       |            |            |
| GD(4)        |           |       |       | ★     |       |       |            |            |
| GD(5)        |           |       |       |       |       |       |            |            |
| GD(6)        |           |       |       |       |       |       |            |            |
| GD(7)        |           |       |       |       |       |       |            |            |
| VF(2)R3      |           |       |       |       | ★     |       |            |            |
| GD(1)R8      |           |       |       |       |       |       |            |            |
| GD(1)R9      |           |       |       | ★     |       |       | ★          |            |
| GD(1)R10     |           |       |       |       |       |       | ★          |            |
| GD(1)R11     |           |       |       |       |       |       |            |            |

EOP <LOD 1

621 **Figure 4. Host-range Efficiency of Plaquing assays on ICP2-resistant OmpU mutants.** Host-  
622 range mutants are organized top to bottom rows according to their Gp23 mutations: the top 11,  
623 AT(1)-GD(1)R2, have no Gp23 mutation; the middle nine, VF(1)-GD(1)R7, have Gp23 S188A;  
624 the lower 11, GD(1)-GD(1)R10, have Gp23 S209R; and the bottom mutant, GD(1)R11, has  
625 Gp23 N190K and S209R. Approximate EOPs from below the limit of detection (<LOD) to 1,  
626 indicated by the scale-bar, are based on the mean of two to five replicates; averages >1 were set  
627 to 1. ICP2 mutants shown in Figure 3 were not retested on OmpU V324F and OmpU G325D;  
628 these boxes use the mean EOP values from Figure 3. ★ indicates that lysis at lower dilutions was  
629 observed in at least two replicates, without single plaques at higher dilutions.

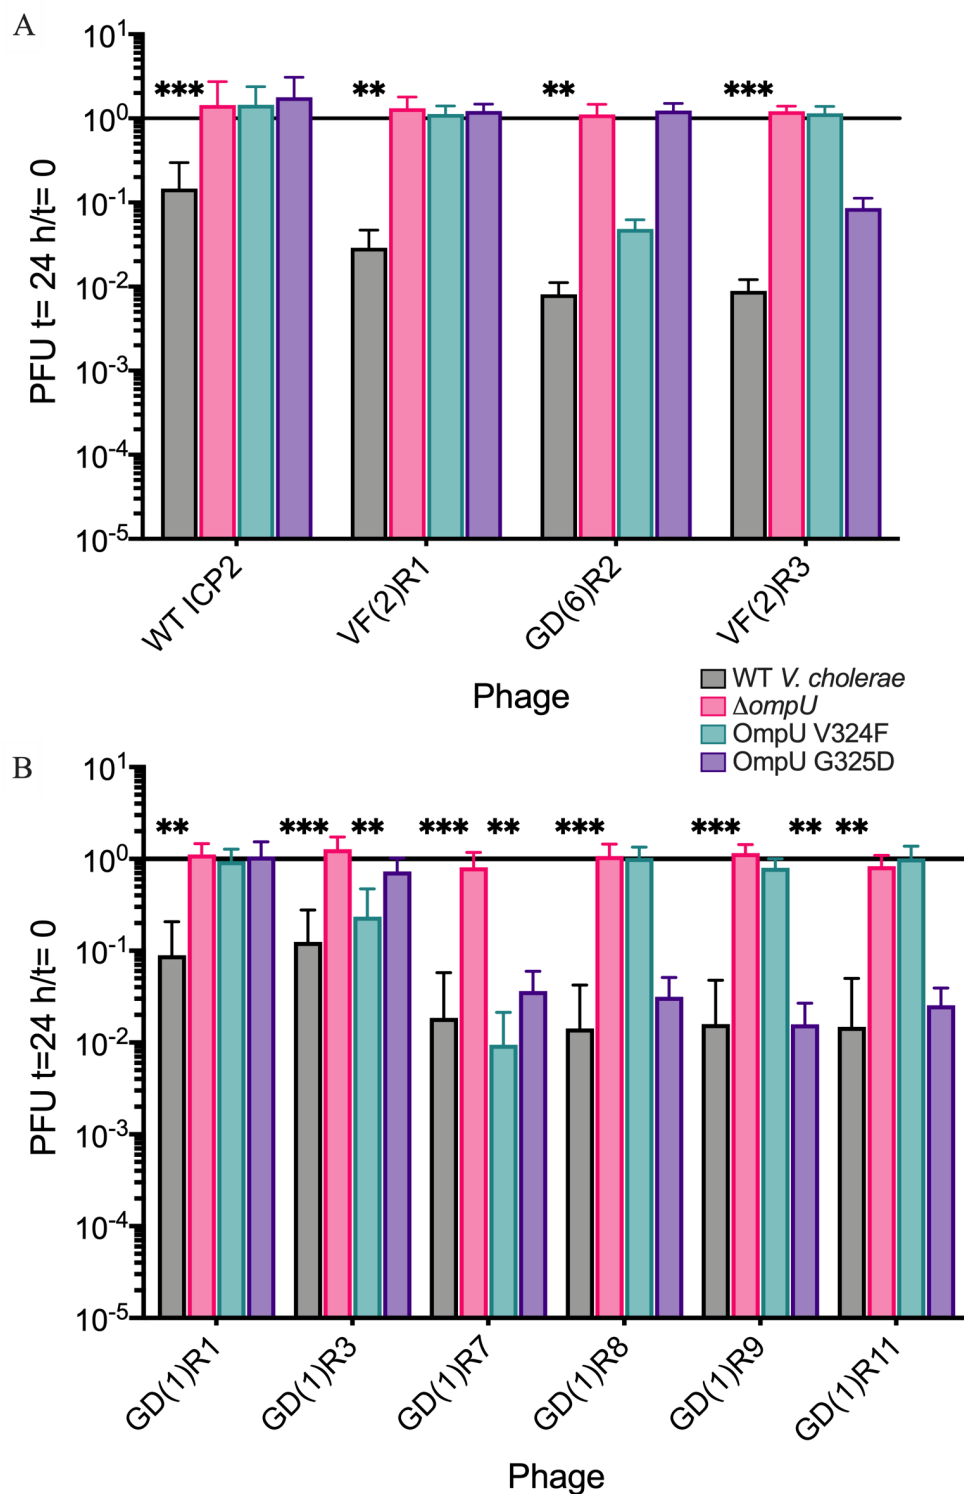

630 **Figure 5. Phage binding to heat-killed OmpU mutant cells.** Phage were added to heat-killed  
 631 cells at an MOI ~ 0.1 and incubated for 24 hrs at room-temperature. Binding was determined as  
 632 the ratio between PFU added (t=0) to PFU remaining at t=24 h; a ratio near 1 indicates no

633 detectable binding. Each bar represents the mean and standard deviation of four to 12 biological  
634 replicates (WT ICP2 n=12, GD(1)R11 on OmpU G325D n=4, most samples have six to nine  
635 biological replicates). Statistical significance was determined relative to no binding to  $\Delta ompU$   
636 (Kruskal-Wallis and *post hoc* Dunn's multiple comparison tests). (\*  $P \leq 0.05$ , \*\*  $P \leq 0.01$ , \*\*\*  $P$   
637  $\leq 0.001$ , \*\*\*\*\*  $P \leq 0.0001$ ). **(A)** WT ICP2 only binds to heat-killed WT *V. cholerae* cells.  
638 VF(2)R1 also only binds WT *V. cholerae* despite having a single Gp25 S742P mutation. The  
639 addition of Gp23 S188A or S209R is associated with binding to OmpU V324F or G325D,  
640 respectively. GD(6)R2 and VF(2)R3 bind OmpU V324F and G325D as expected, but not at  
641 statistically significant amounts. **(B)** Similarly, GD(1)R1 has two Gp25 mutations but only binds  
642 to WT *V. cholerae*. The addition of Gp23 S188A or S209R results in the ability to bind specific  
643 OmpU alleles. Binding to OmpU G325D does not reach statistical significance. GD(1)R7 binds  
644 both OmpU alleles despite only forming plaques on OmpU V324F.

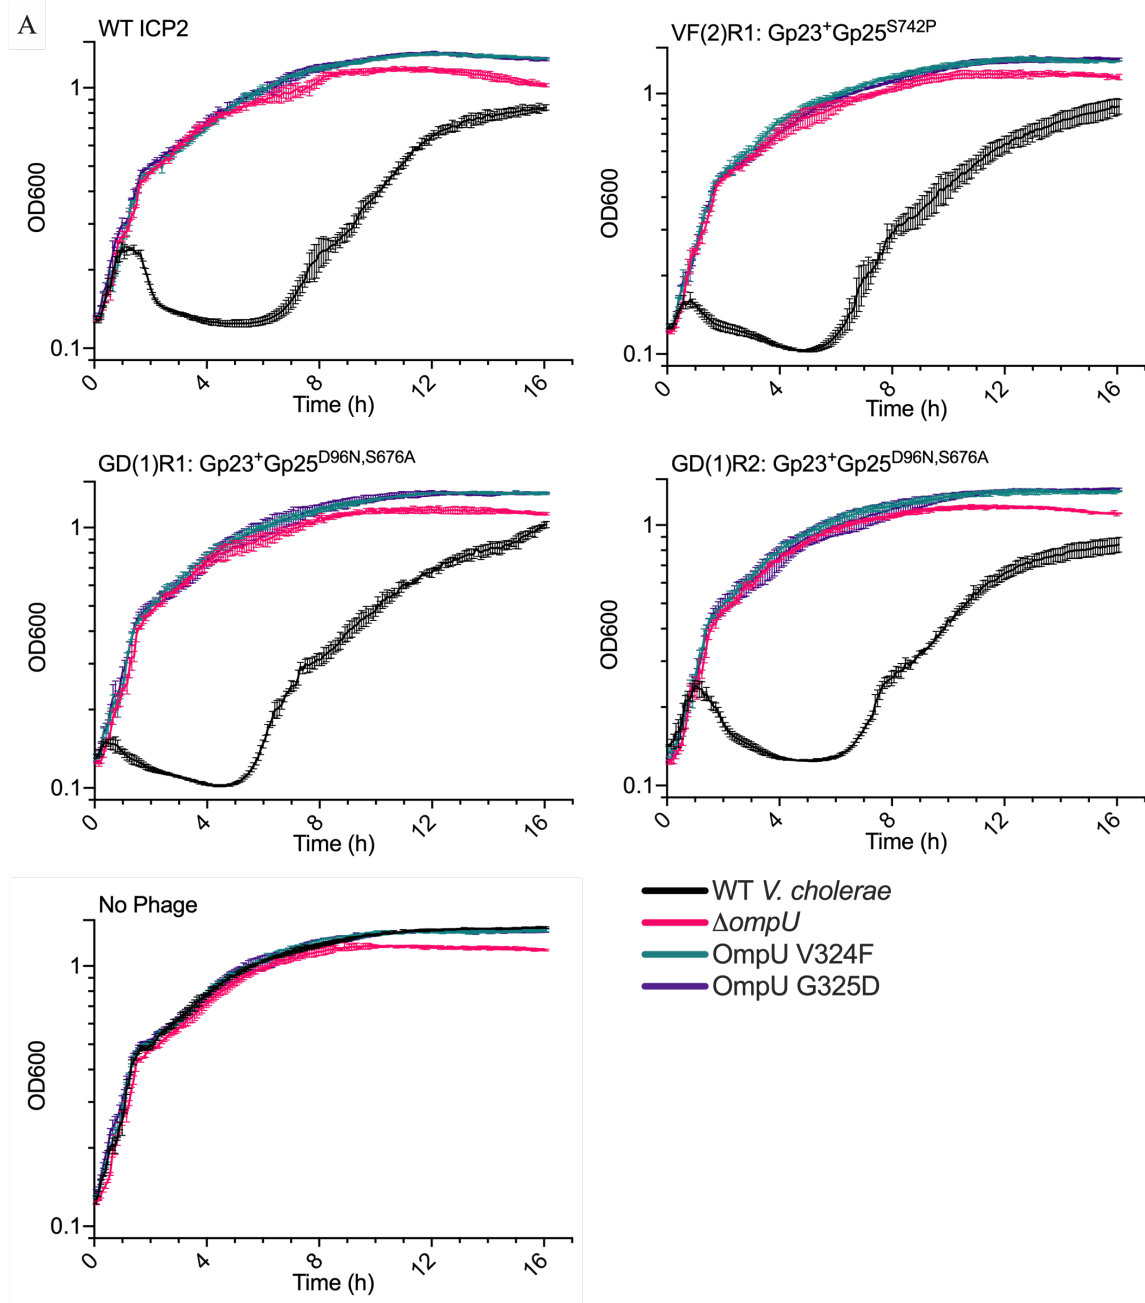

645

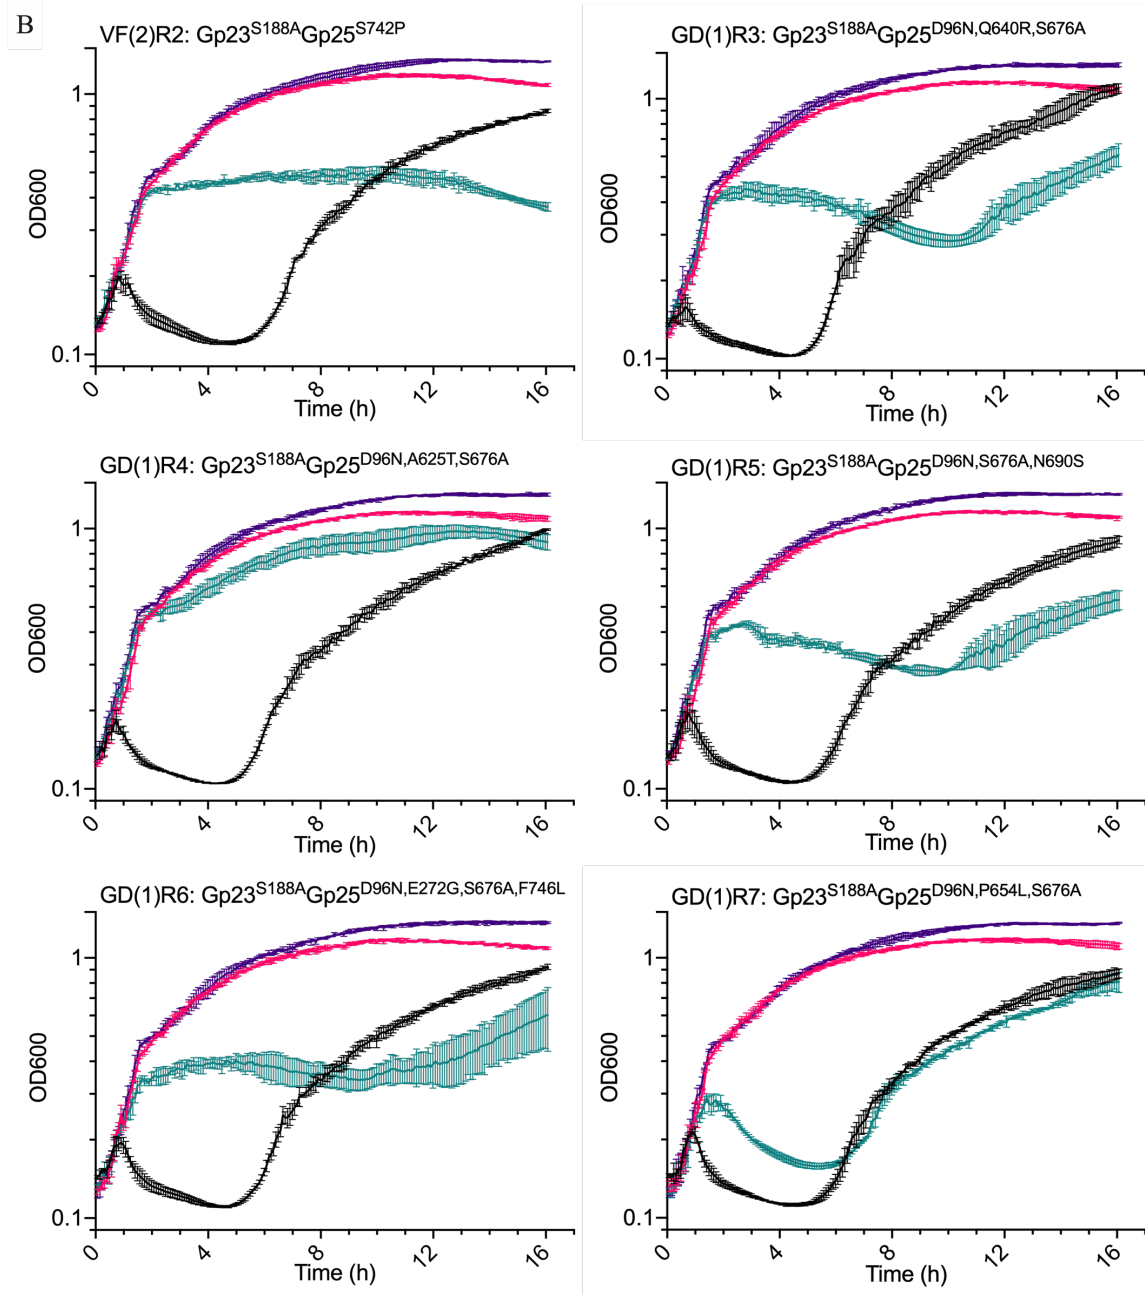

646

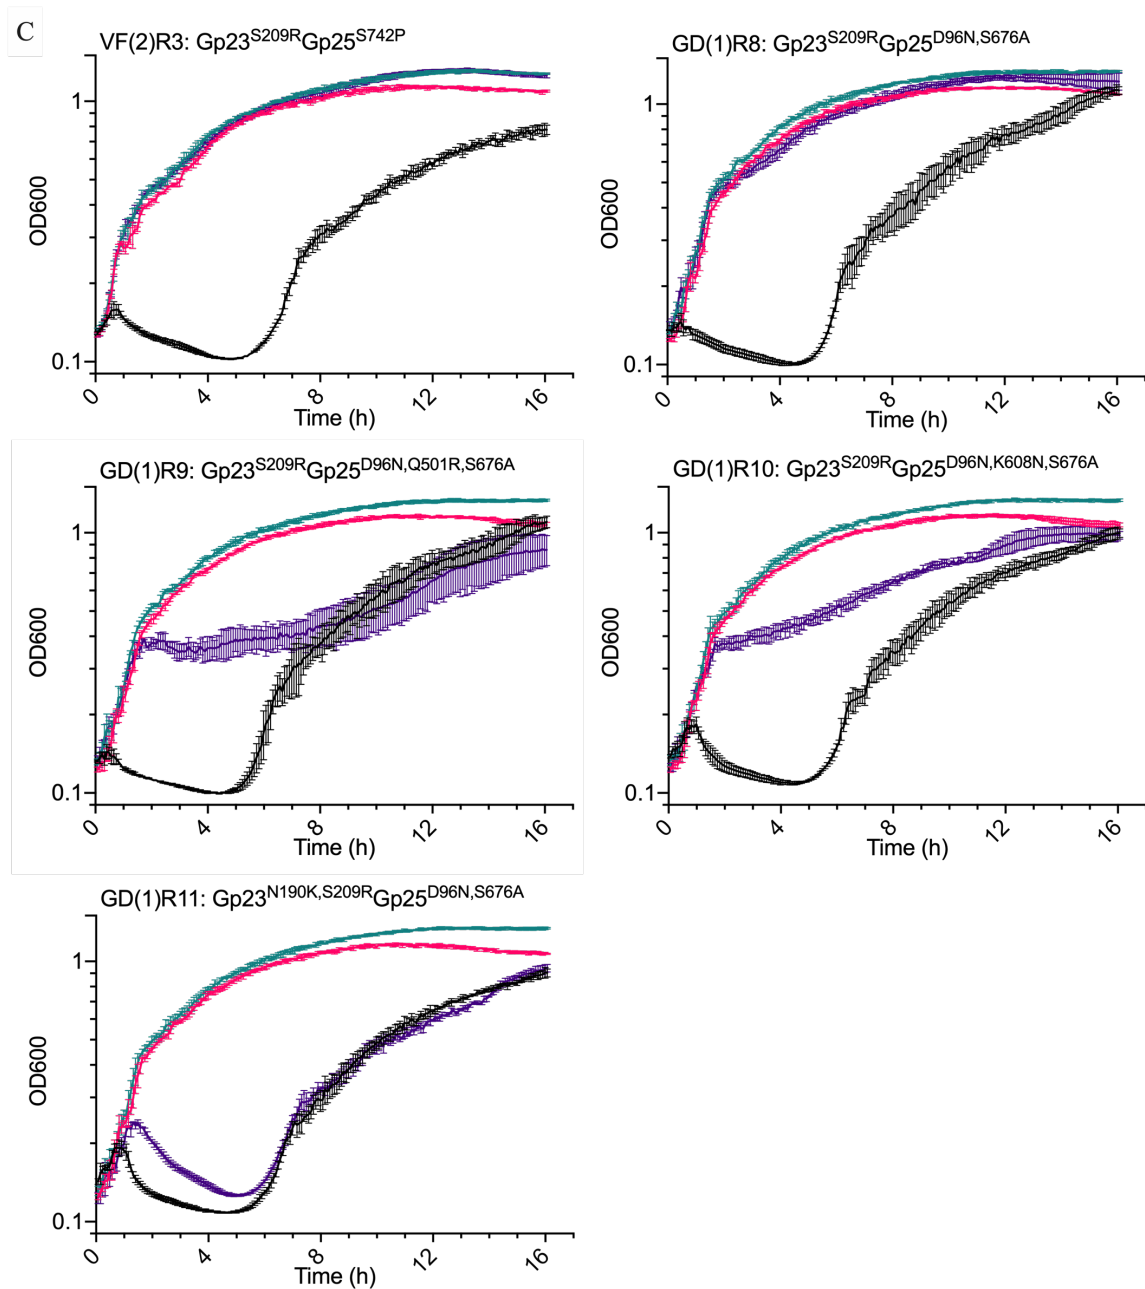

647 **Figure 6. Phage predation killing assays in broth culture.** Killing assays were used to  
648 evaluate how different ICP2 mutants prey on actively replicating cultures of WT *V. cholerae*,  
649  $\Delta ompU$ , *OmpU* V324F, and *OmpU* G325D. Early- to mid-exponential growth phase cells were  
650 infected at an MOI  $\sim 1$ . The optical density at 600 nm was measured every 5 min over 16 hrs at  
651 37°C in a BioTek plate reader. Each graph represents the mean of three technical replicates.

652 Error bars represent standard deviation. A no phage control shows that  $\Delta ompU$  has a slight  
653 growth defect. **(A)** WT ICP2 can only prey on WT *V. cholerae*. ICP2 host-range mutants with  
654 only Gp25 mutations do not effectively kill OmpU V324F or OmpU G325D. **(B)** ICP2 host-  
655 range mutants with a secondary Gp23 S188A kill OmpU V324F with varying degrees of  
656 efficiency. **(C)** VF(2)R3 does not kill OmpU G325D despite having a secondary Gp23 S209R  
657 mutation, corresponding with its lower EOP and turbid plaque morphology on this host. The  
658 remaining ICP2 host-range mutants with Gp23 S209R prey on OmpU G325D, but with varying  
659 degrees of efficiency.
